# Supplementary material for: Highly sensitive ratiometric luminescence manometers based on the multisite emission of Cr3+
Source: Royal Society of Chemistry journal article supplement (doi:10.1039/d4tc04639k), 2025-01-01
Supplement: d4tc04639k1.pdf [file d4tc04639k1.pdf]

## Supporting Information

### Highly sensitive ratiometric luminescence manometer based on the multisite emission of Cr<sup>3+</sup>

M. Szymczak<sup>1</sup>, W.M. Piotrowski<sup>1</sup>, U. R. Rodríguez-Mendoza<sup>2</sup>, P. Wozny<sup>3</sup>,

M. Runowski<sup>3</sup>, L. Marciniak<sup>1\*</sup>

<sup>1</sup>Institute of Low Temperature and Structure Research, Polish Academy of Sciences,

Okólna 2, 50-422 Wrocław, Poland

<sup>2</sup>Departamento de Física, Instituto de Materiales y Nanotecnología, IUDEA & MALTA Consolider Team,  
Universidad de La Laguna, Apdo. Correos 456, E-38200 San Cristóbal de La Laguna, Santa Cruz de Tenerife,

Spain

<sup>3</sup>Faculty of Chemistry, Adam Mickiewicz University, Uniwersytetu Poznańskiego 8, 61-614 Poznań, Poland

\*corresponding author: l.marciniak@intibs.pl

*KEYWORDS luminescent manometer, luminescence thermometry, optical sensors, ratiometric approach*

**Table S1.** Estimated peak centroids of the main Raman modes at pressure values when start to be visible, and the corresponding pressure shift rates of the Raman modes for the MgGeO<sub>3</sub> material.

| Peak centroid (cm <sup>-1</sup> ) | Shift rate (cm <sup>-1</sup> /GPa) |
|-----------------------------------|------------------------------------|
| ≈340                              | 3.80 ± 0.12                        |
| ≈360                              | 2.67 ± 0.09                        |
| ≈400                              | 3.77 ± 0.25                        |
| ≈570                              | 4.94 ± 0.16                        |
| ≈710                              | 3.31 ± 0.11                        |
| ≈860                              | 4.46 ± 0.23                        |
| ≈880                              | 4.77 ± 0.19                        |

MgGeO<sub>3</sub>:0.1%Cr<sup>3+</sup>

**Global Parameters**

|                                                   |                       |
|---------------------------------------------------|-----------------------|
| Number of used phases:                            | 1                     |
| Number of variables:                              | 14                    |
| Number of constraints:                            | 0                     |
| Zero shift/ °2Theta:                              | 0,000000              |
| Specimen displacement/ mm :                       | -0,157(1)             |
| Profile function:                                 | Pseudo Voigt          |
| Background:                                       | Polynomial            |
| R (expected)/ %:                                  | 0,19313               |
| R (profile)/ %:                                   | 1,87123               |
| R (weighted profile)/ %:                          | 3,21522               |
| GOF:                                              | 277,16500             |
| d-statistic:                                      | 0,65523               |
| U standard:                                       | 0,000000              |
| V standard:                                       | 0,000000              |
| W standard:                                       | 0,010000              |
| U Left:                                           | 0,000000              |
| V Left:                                           | 0,000000              |
| W Left:                                           | 0,010000              |
| U Right:                                          | 0,000000              |
| V Right:                                          | 0,000000              |
| W Right:                                          | 0,010000              |
| Asymmetry Type:                                   | No Asymmetry Function |
| Asymmetry 1:                                      | 0,000000              |
| Asymmetry 2:                                      | 0,000000              |
| Shape Type:                                       | Shape Individual      |
| Shape 1 Left:                                     | 0,600000              |
| Shape 2 Left:                                     | 0,000000              |
| Shape 3 Left:                                     | 0,000000              |
| Shape 1 Right:                                    | 0,600000              |
| Shape 2 Right:                                    | 0,000000              |
| Shape 3 Right:                                    | 0,000000              |
| K α <sub>1</sub> /α <sub>2</sub> intensity ratio: | 0,500000              |
| K α/beta intensity ratio:                         | 0,000000              |
| Crystal Shape Factor K:                           | 1,0000                |
| Instrumental FWHM Curve Type:                     | Caglioti function     |
| Instr. Gauss Curve Coefficient A:                 | 0,0045(5)             |
| Instr. Gauss Curve Coefficient B:                 | -0,0032(9)            |
| Instr. Gauss Curve Coefficient C:                 | 0,0046(3)             |
| Instr. Lorentz Curve Coefficient A:               | 0,0062(7)             |
| Instr. Lorentz Curve Coefficient B:               | -0,004(1)             |
| Instr. Lorentz Curve Coefficient C:               | 0,0064(5)             |

**Relevant parameters of 35533-ICSD, MgGeO<sub>3</sub>, Pbc<sub>a</sub>**

|                                         |                                                            |
|-----------------------------------------|------------------------------------------------------------|
| Structure and profile data:             |                                                            |
| Formula sum:                            | Mg <sub>16·00</sub> Ge <sub>16·00</sub> O <sub>48·00</sub> |
| Formula mass/ g/mol:                    | 2318,2910                                                  |
| Density (calculated)/ g/cm <sup>3</sup> | 4,2745                                                     |
| F(000):                                 | 1088,0000                                                  |
| Weight fraction/ %:                     | 100,000000                                                 |
| Space group (No.):                      | P b c a (61)                                               |
| Lattice parameters:                     |                                                            |
| a/ Å:                                   | 18,8091(5)                                                 |
| b/ Å:                                   | 8,9588(2)                                                  |
| c/ Å:                                   | 5,3438(1)                                                  |
| α/ °:                                   | 90                                                         |
| β/ °:                                   | 90                                                         |
| γ/ °:                                   | 90                                                         |
| V/ 10 <sup>6</sup> pm <sup>3</sup>      | 900,47090                                                  |
| Overall displacement parameter:         | 0,000000                                                   |
| Extinction:                             | 0,000000                                                   |
| Flat Plate Absorption Correction:       | 0,000000                                                   |
| Porosity:                               | 0,000000                                                   |

Roughness: 0,000000  
 Fitting mode: Structure Fit  
 U Left: 0,034(7)  
 V Left: -0,010(6)  
 W Left: 0,014(1)  
 Preferred orientation direction/ hkl: 0,00 0,00 1,00  
 Preferred orientation parameter: 1,000000  
 Asymmetry parameter 1: 0,000000  
 Asymmetry parameter 2: 0,000000  
 Peak shape:  
 parameter 1 Left: 0,65(1)  
 parameter 2 Left: 0,000000  
 parameter 3 Left: 0,000000  
 R (Bragg)/ %: 2,27669

**Occupancy, atomic fract. coordinates and Biso for 35533-ICSD, MgGeO<sub>3</sub>, Pbcn**

| Atom | Wyck. | s.o.f.   | x        | y        | z        | B/ 10 <sup>4</sup> pm <sup>2</sup> |          |
|------|-------|----------|----------|----------|----------|------------------------------------|----------|
| Mg1  | 8c    | 1,000000 | 0,123360 | 0,656530 | 0,851890 | 0,851890                           | 0,000000 |
| Mg2  | 8c    | 1,000000 | 0,122190 | 0,488820 | 0,343520 | 0,343520                           | 0,000000 |
| Ge1  | 8c    | 1,000000 | 0,027800 | 0,339590 | 0,805350 | 0,805350                           | 0,000000 |
| Ge2  | 8c    | 1,000000 | 0,229070 | 0,345090 | 0,041410 | 0,041410                           | 0,000000 |
| O1   | 8c    | 1,000000 | 0,935450 | 0,338430 | 0,814780 | 0,814780                           | 0,000000 |
| O2   | 8c    | 1,000000 | 0,069360 | 0,488810 | 0,670450 | 0,670450                           | 0,000000 |
| O3   | 8c    | 1,000000 | 0,055450 | 0,319810 | 0,125190 | 0,125190                           | 0,000000 |
| O4   | 8c    | 1,000000 | 0,320480 | 0,340070 | 0,021910 | 0,021910                           | 0,000000 |
| O5   | 8c    | 1,000000 | 0,187680 | 0,514400 | 0,033320 | 0,033320                           | 0,000000 |
| O6   | 8c    | 1,000000 | 0,193260 | 0,289580 | 0,336850 | 0,336850                           | 0,000000 |

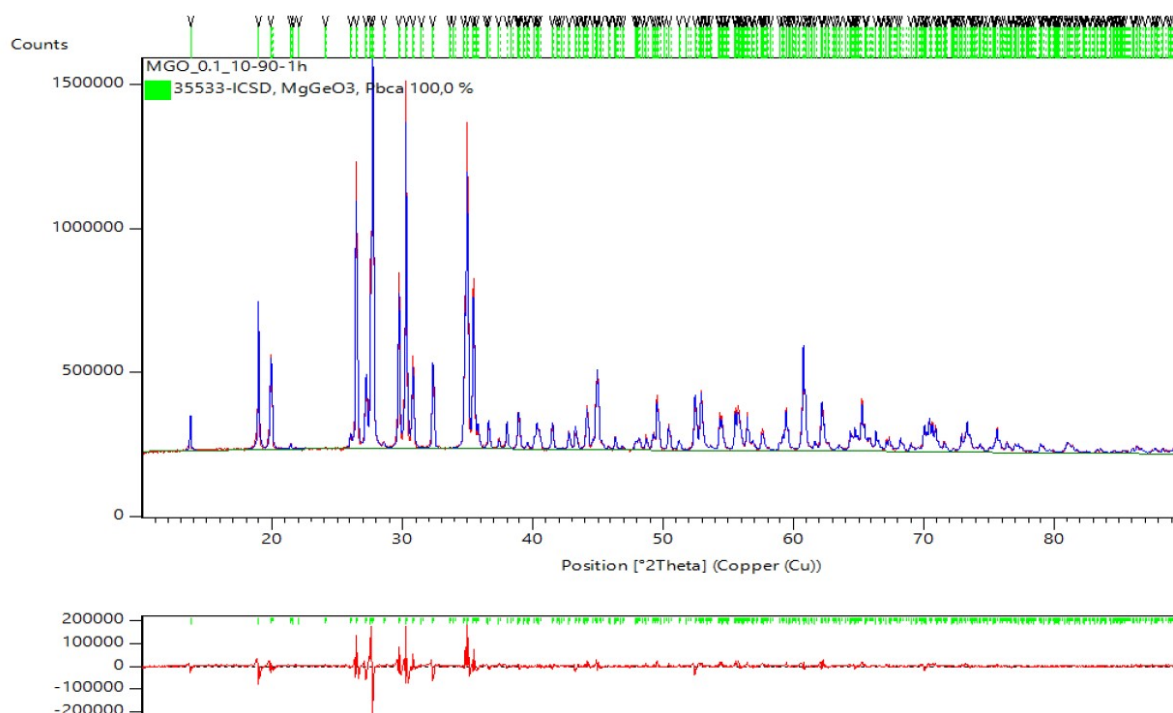

**Figure S1.** Rietveld refinement of XRD pattern of MgGeO<sub>3</sub>:0.1%Cr<sup>3+</sup>.

MgGeO<sub>3</sub>:0.5%Cr<sup>3+</sup>

## Global Parameters

|                                     |                       |
|-------------------------------------|-----------------------|
| Number of used phases:              | 1                     |
| Number of variables:                | 14                    |
| Number of constraints:              | 0                     |
| Zero shift/ °2Theta:                | 0,000000              |
| Specimen displacement/ mm :         | -0,098(1)             |
| Profile function:                   | Pseudo Voigt          |
| Background:                         | Polynomial            |
| R (expected)/ %:                    | 0,19064               |
| R (profile)/ %:                     | 1,96927               |
| R (weighted profile)/ %:            | 3,36953               |
| GOF:                                | 312,39200             |
| d-statistic:                        | 0,66770               |
| U standard:                         | 0,000000              |
| V standard:                         | 0,000000              |
| W standard:                         | 0,010000              |
| U Left:                             | 0,000000              |
| V Left:                             | 0,000000              |
| W Left:                             | 0,010000              |
| U Right:                            | 0,000000              |
| V Right:                            | 0,000000              |
| W Right:                            | 0,010000              |
| Asymmetry Type:                     | No Asymmetry Function |
| Asymmetry 1:                        | 0,000000              |
| Asymmetry 2:                        | 0,000000              |
| Shape Type:                         | Shape Individual      |
| Shape 1 Left:                       | 0,600000              |
| Shape 2 Left:                       | 0,000000              |
| Shape 3 Left:                       | 0,000000              |
| Shape 1 Right:                      | 0,600000              |
| Shape 2 Right:                      | 0,000000              |
| Shape 3 Right:                      | 0,000000              |
| K a1/a2 intensity ratio:            | 0,500000              |
| K alpha/beta intensity ratio:       | 0,000000              |
| Crystal Shape Factor K:             | 1,0000                |
| Instrumental FWHM Curve Type:       | Caglioti function     |
| Instr. Gauss Curve Coefficient A:   | 0,0045(5)             |
| Instr. Gauss Curve Coefficient B:   | -0,0032(9)            |
| Instr. Gauss Curve Coefficient C:   | 0,0046(3)             |
| Instr. Lorentz Curve Coefficient A: | 0,0062(7)             |
| Instr. Lorentz Curve Coefficient B: | -0,004(1)             |
| Instr. Lorentz Curve Coefficient C: | 0,0064(5)             |

## Relevant parameters of 35533-ICSD, MgGeO3, Pbc

|                                         |                                                            |
|-----------------------------------------|------------------------------------------------------------|
| Structure and profile data:             |                                                            |
| Formula sum:                            | Mg <sub>16·00</sub> Ge <sub>16·00</sub> O <sub>48·00</sub> |
| Formula mass/ g/mol:                    | 2318,2910                                                  |
| Density (calculated)/ g/cm <sup>3</sup> | 4,2746                                                     |
| F(000):                                 | 1088,0000                                                  |
| Weight fraction/ %:                     | 100,000000                                                 |
| Space group (No.):                      | P b c a (61)                                               |
| Lattice parameters:                     |                                                            |
| a/ Å:                                   | 18,8114(5)                                                 |
| b/ Å:                                   | 8,9575(2)                                                  |
| c/ Å:                                   | 5,3439(1)                                                  |
| alpha/ °:                               | 90                                                         |
| beta/ °:                                | 90                                                         |
| gamma/ °:                               | 90                                                         |
| V/ 10 <sup>6</sup> pm <sup>3</sup>      | 900,45860                                                  |
| Overall displacement parameter:         | 0,000000                                                   |
| Extinction:                             | 0,000000                                                   |
| Flat Plate Absorption Correction:       | 0,000000                                                   |
| Porosity:                               | 0,000000                                                   |
| Roughness:                              | 0,000000                                                   |
| Fitting mode:                           | Structure Fit                                              |
| U Left:                                 | 0,034(8)                                                   |
| V Left:                                 | -0,010(6)                                                  |
| W Left:                                 | 0,014(1)                                                   |
| Preferred orientation direction/ hkl:   | 0,00 0,00 1,00                                             |
| Preferred orientation parameter:        | 1,000000                                                   |
| Asymmetry parameter 1:                  | 0,000000                                                   |

Asymmetry parameter 2: 0,000000  
 Peak shape:  
 parameter 1 Left: 0,66(1)  
 parameter 2 Left: 0,000000  
 parameter 3 Left: 0,000000  
 R (Bragg)/ %: 2,53705

**Occupancy, atomic fract. coordinates and Biso for 35533-ICSD, MgGeO3, Pbc1**

| Atom | Wyck. | s.o.f.   | x        | y        | z        | B/ 10 <sup>4</sup> pm <sup>2</sup> |
|------|-------|----------|----------|----------|----------|------------------------------------|
| Mg1  | 8c    | 1,000000 | 0,123360 | 0,656530 | 0,851890 | 0,000000                           |
| Mg2  | 8c    | 1,000000 | 0,122190 | 0,488820 | 0,343520 | 0,000000                           |
| Ge1  | 8c    | 1,000000 | 0,027800 | 0,339590 | 0,805350 | 0,000000                           |
| Ge2  | 8c    | 1,000000 | 0,229070 | 0,345090 | 0,041410 | 0,000000                           |
| O1   | 8c    | 1,000000 | 0,935450 | 0,338430 | 0,814780 | 0,000000                           |
| O2   | 8c    | 1,000000 | 0,069360 | 0,488810 | 0,670450 | 0,000000                           |
| O3   | 8c    | 1,000000 | 0,055450 | 0,319810 | 0,125190 | 0,000000                           |
| O4   | 8c    | 1,000000 | 0,320480 | 0,340070 | 0,021910 | 0,000000                           |
| O5   | 8c    | 1,000000 | 0,187680 | 0,514400 | 0,033320 | 0,000000                           |
| O6   | 8c    | 1,000000 | 0,193260 | 0,289580 | 0,336850 | 0,000000                           |

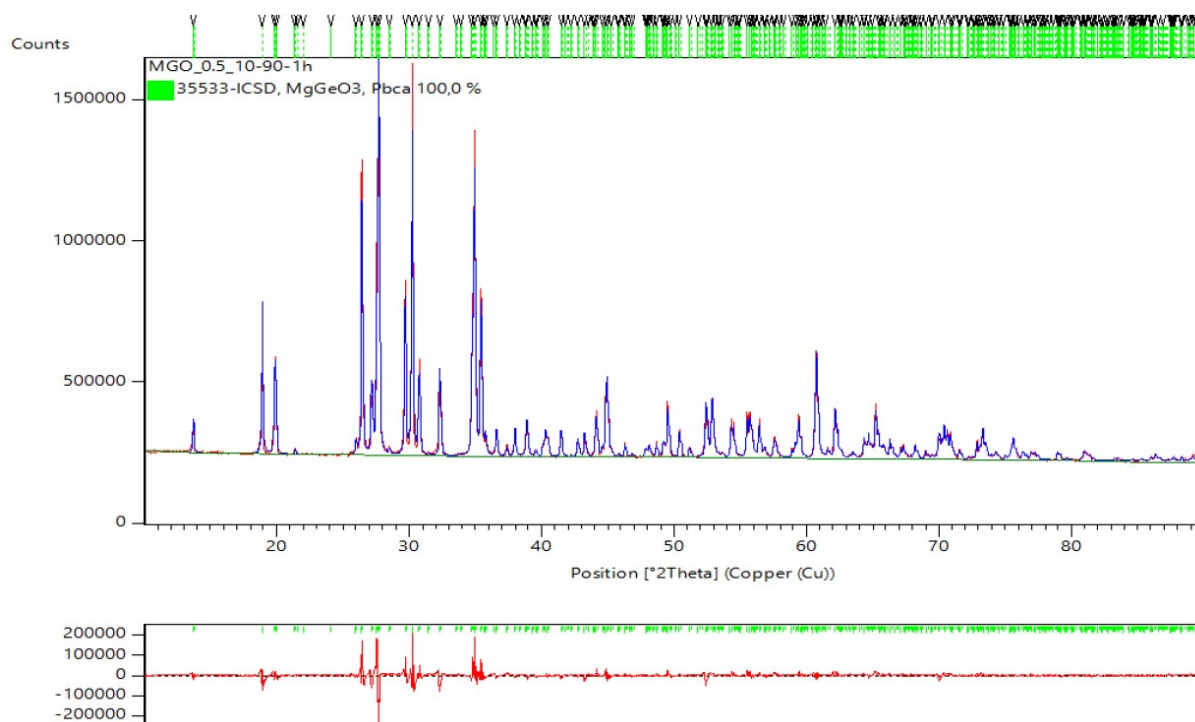

**Figure S2.** Rietveld refinement of XRD pattern of MgGeO<sub>3</sub>:0.5%Cr<sup>3+</sup>.

MgGeO<sub>3</sub>:1%Cr<sup>3+</sup>

**Global Parameters**

Number of used phases: 1  
 Number of variables: 14  
 Number of constraints: 0  
 Zero shift/ °2Theta: 0,000000

|                                        |                       |
|----------------------------------------|-----------------------|
| Specimen displacement/ mm :            | -0,184(1)             |
| Profile function:                      | Pseudo Voigt          |
| Background:                            | Polynomial            |
| R (expected)/ %:                       | 0,19091               |
| R (profile)/ %:                        | 2,04571               |
| R (weighted profile)/ %:               | 3,50891               |
| GOF:                                   | 337,80620             |
| d-statistic:                           | 0,57519               |
| U standard:                            | 0,000000              |
| V standard:                            | 0,000000              |
| W standard:                            | 0,010000              |
| U Left:                                | 0,000000              |
| V Left:                                | 0,000000              |
| W Left:                                | 0,010000              |
| U Right:                               | 0,000000              |
| V Right:                               | 0,000000              |
| W Right:                               | 0,010000              |
| Asymmetry Type:                        | No Asymmetry Function |
| Asymmetry 1:                           | 0,000000              |
| Asymmetry 2:                           | 0,000000              |
| Shape Type:                            | Shape Individual      |
| Shape 1 Left:                          | 0,600000              |
| Shape 2 Left:                          | 0,000000              |
| Shape 3 Left:                          | 0,000000              |
| Shape 1 Right:                         | 0,600000              |
| Shape 2 Right:                         | 0,000000              |
| Shape 3 Right:                         | 0,000000              |
| K $\alpha_1/\alpha_2$ intensity ratio: | 0,500000              |
| K $\alpha/\beta$ intensity ratio:      | 0,000000              |
| Crystal Shape Factor K:                | 1,0000                |
| Instrumental FWHM Curve Type:          | Caglioti function     |
| Instr. Gauss Curve Coefficient A:      | 0,0045(5)             |
| Instr. Gauss Curve Coefficient B:      | -0,0032(9)            |
| Instr. Gauss Curve Coefficient C:      | 0,0046(3)             |
| Instr. Lorentz Curve Coefficient A:    | 0,0062(7)             |
| Instr. Lorentz Curve Coefficient B:    | -0,004(1)             |
| Instr. Lorentz Curve Coefficient C:    | 0,0064(5)             |

### **Relevant parameters of 35533-ICSD, MgGeO<sub>3</sub>, Pbca**

|                                         |                                                   |
|-----------------------------------------|---------------------------------------------------|
| Structure and profile data:             |                                                   |
| Formula sum:                            | Mg <sub>16</sub> Ge <sub>16</sub> O <sub>48</sub> |
| Formula mass/ g/mol:                    | 2318,2910                                         |
| Density (calculated)/ g/cm <sup>3</sup> | 4,2744                                            |
| F(000):                                 | 1088,0000                                         |
| Weight fraction/ %:                     | 100,000000                                        |
| Space group (No.):                      | P b c a (61)                                      |
| Lattice parameters:                     |                                                   |
| a/ Å:                                   | 18,8111(5)                                        |
| b/ Å:                                   | 8,9575(2)                                         |
| c/ Å:                                   | 5,3441(1)                                         |
| alpha/ °:                               | 90                                                |
| beta/ °:                                | 90                                                |
| gamma/ °:                               | 90                                                |
| V/ 10 <sup>6</sup> pm <sup>3</sup>      | 900,49250                                         |
| Overall displacement parameter:         | 0,000000                                          |
| Extinction:                             | 0,000000                                          |
| Flat Plate Absorption Correction:       | 0,000000                                          |
| Porosity:                               | 0,000000                                          |
| Roughness:                              | 0,000000                                          |
| Fitting mode:                           | Structure Fit                                     |
| U Left:                                 | 0,033(8)                                          |
| V Left:                                 | -0,010(7)                                         |
| W Left:                                 | 0,014(1)                                          |
| Preferred orientation direction/ hkl:   | 0,00 0,00 1,00                                    |
| Preferred orientation parameter:        | 1,000000                                          |
| Asymmetry parameter 1:                  | 0,000000                                          |
| Asymmetry parameter 2:                  | 0,000000                                          |
| Peak shape:                             |                                                   |
| parameter 1 Left:                       | 0,63(1)                                           |
| parameter 2 Left:                       | 0,000000                                          |
| parameter 3 Left:                       | 0,000000                                          |
| R (Bragg)/ %:                           | 2,71266                                           |

### Occupancy, atomic fract. coordinates and Biso for 35533-ICSD, MgGeO<sub>3</sub>, Pbcn

| Atom | Wyck. | s.o.f.   | x        | y        | z        | B/ 10 <sup>4</sup> pm <sup>2</sup> |
|------|-------|----------|----------|----------|----------|------------------------------------|
| Mg1  | 8c    | 1,000000 | 0,123360 | 0,656530 | 0,851890 | 0,000000                           |
| Mg2  | 8c    | 1,000000 | 0,122190 | 0,488820 | 0,343520 | 0,000000                           |
| Ge1  | 8c    | 1,000000 | 0,027800 | 0,339590 | 0,805350 | 0,000000                           |
| Ge2  | 8c    | 1,000000 | 0,229070 | 0,345090 | 0,041410 | 0,000000                           |
| O1   | 8c    | 1,000000 | 0,935450 | 0,338430 | 0,814780 | 0,000000                           |
| O2   | 8c    | 1,000000 | 0,069360 | 0,488810 | 0,670450 | 0,000000                           |
| O3   | 8c    | 1,000000 | 0,055450 | 0,319810 | 0,125190 | 0,000000                           |
| O4   | 8c    | 1,000000 | 0,320480 | 0,340070 | 0,021910 | 0,000000                           |
| O5   | 8c    | 1,000000 | 0,187680 | 0,514400 | 0,033320 | 0,000000                           |
| O6   | 8c    | 1,000000 | 0,193260 | 0,289580 | 0,336850 | 0,000000                           |

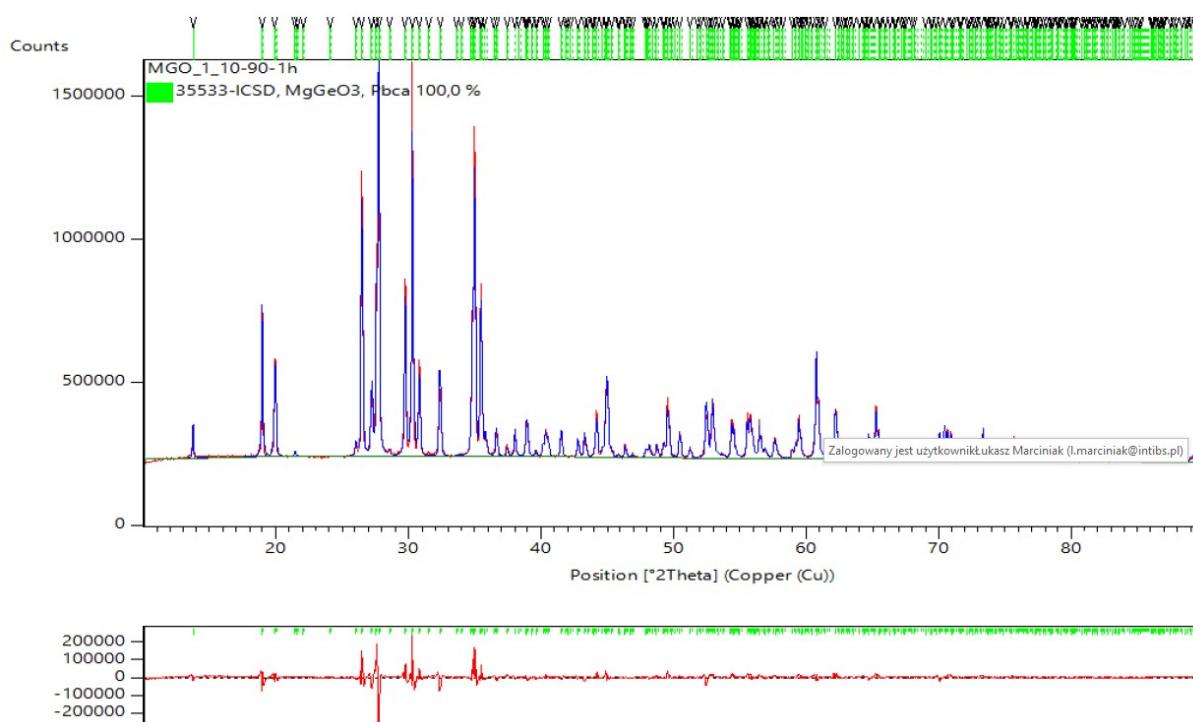

Figure S3. Rietveld refinement of XRD pattern of MgGeO<sub>3</sub>:1%Cr<sup>3+</sup>.

### MgGeO<sub>3</sub>:2%Cr<sup>3+</sup>

#### Global Parameters

|                             |              |
|-----------------------------|--------------|
| Number of used phases:      | 1            |
| Number of variables:        | 14           |
| Number of constraints:      | 0            |
| Zero shift/ °2Theta:        | 0,000000     |
| Specimen displacement/ mm : | -0,076(1)    |
| Profile function:           | Pseudo Voigt |
| Background:                 | Polynomial   |
| R (expected)/ %:            | 0,19556      |

|                                     |                       |
|-------------------------------------|-----------------------|
| R (profile)/ %:                     | 2,05567               |
| R (weighted profile)/ %:            | 3,66397               |
| GOF:                                | 351,04610             |
| d-statistic:                        | 0,56927               |
| U standard:                         | 0,000000              |
| V standard:                         | 0,000000              |
| W standard:                         | 0,010000              |
| U Left:                             | 0,000000              |
| V Left:                             | 0,000000              |
| W Left:                             | 0,010000              |
| U Right:                            | 0,000000              |
| V Right:                            | 0,000000              |
| W Right:                            | 0,010000              |
| Asymmetry Type:                     | No Asymmetry Function |
| Asymmetry 1:                        | 0,000000              |
| Asymmetry 2:                        | 0,000000              |
| Shape Type:                         | Shape Individual      |
| Shape 1 Left:                       | 0,600000              |
| Shape 2 Left:                       | 0,000000              |
| Shape 3 Left:                       | 0,000000              |
| Shape 1 Right:                      | 0,600000              |
| Shape 2 Right:                      | 0,000000              |
| Shape 3 Right:                      | 0,000000              |
| K a1/a2 intensity ratio:            | 0,500000              |
| K alpha/beta intensity ratio:       | 0,000000              |
| Crystal Shape Factor K:             | 1,0000                |
| Instrumental FWHM Curve Type:       | Caglioti function     |
| Instr. Gauss Curve Coefficient A:   | 0,0045(5)             |
| Instr. Gauss Curve Coefficient B:   | -0,0032(9)            |
| Instr. Gauss Curve Coefficient C:   | 0,0046(3)             |
| Instr. Lorentz Curve Coefficient A: | 0,0062(7)             |
| Instr. Lorentz Curve Coefficient B: | -0,004(1)             |
| Instr. Lorentz Curve Coefficient C: | 0,0064(5)             |

### **Relevant parameters of 35533-ICSD, MgGeO3, Pbca**

|                                         |                                                            |
|-----------------------------------------|------------------------------------------------------------|
| Structure and profile data:             |                                                            |
| Formula sum:                            | Mg <sub>16·00</sub> Ge <sub>16·00</sub> O <sub>48·00</sub> |
| Formula mass/ g/mol:                    | 2318,2910                                                  |
| Density (calculated)/ g/cm <sup>3</sup> | 4,2742                                                     |
| F(000):                                 | 1088,0000                                                  |
| Weight fraction/ %:                     | 100,000000                                                 |
| Space group (No.):                      | P b c a (61)                                               |
| Lattice parameters:                     |                                                            |
| a/ Å:                                   | 18,8114(5)                                                 |
| b/ Å:                                   | 8,9576(3)                                                  |
| c/ Å:                                   | 5,3442(2)                                                  |
| alpha/ °:                               | 90                                                         |
| beta/ °:                                | 90                                                         |
| gamma/ °:                               | 90                                                         |
| V/ 10 <sup>6</sup> pm <sup>3</sup>      | 900,52460                                                  |
| Overall displacement parameter:         | 0,000000                                                   |
| Extinction:                             | 0,000000                                                   |
| Flat Plate Absorption Correction:       | 0,000000                                                   |
| Porosity:                               | 0,000000                                                   |
| Roughness:                              | 0,000000                                                   |
| Fitting mode:                           |                                                            |
| U Left:                                 | 0,035(9)                                                   |
| V Left:                                 | -0,010(7)                                                  |
| W Left:                                 | 0,014(1)                                                   |
| Preferred orientation direction/ hkl:   | 0,00 0,00 1,00                                             |
| Preferred orientation parameter:        | 1,000000                                                   |
| Asymmetry parameter 1:                  | 0,000000                                                   |
| Asymmetry parameter 2:                  | 0,000000                                                   |
| Peak shape:                             |                                                            |
| parameter 1 Left:                       | 0,64(1)                                                    |
| parameter 2 Left:                       | 0,000000                                                   |
| parameter 3 Left:                       | 0,000000                                                   |
| R (Bragg)/ %:                           | 2,90631                                                    |

### **Occupancy, atomic fract. coordinates and Biso for 35533-ICSD, MgGeO3, Pbca**

| Atom | Wyck. | s.o.f.   | x        | y        | z        | B/ 10 <sup>4</sup> pm <sup>2</sup> |
|------|-------|----------|----------|----------|----------|------------------------------------|
| Mg1  | 8c    | 1,000000 | 0,123360 | 0,656530 | 0,851890 | 0,000000                           |



|     |    |          |          |          |          |          |
|-----|----|----------|----------|----------|----------|----------|
| Mg2 | 8c | 1,000000 | 0,122190 | 0,488820 | 0,343520 | 0,000000 |
| Ge1 | 8c | 1,000000 | 0,027800 | 0,339590 | 0,805350 | 0,000000 |
| Ge2 | 8c | 1,000000 | 0,229070 | 0,345090 | 0,041410 | 0,000000 |
| O1  | 8c | 1,000000 | 0,935450 | 0,338430 | 0,814780 | 0,000000 |
| O2  | 8c | 1,000000 | 0,069360 | 0,488810 | 0,670450 | 0,000000 |
| O3  | 8c | 1,000000 | 0,055450 | 0,319810 | 0,125190 | 0,000000 |
| O4  | 8c | 1,000000 | 0,320480 | 0,340070 | 0,021910 | 0,000000 |
| O5  | 8c | 1,000000 | 0,187680 | 0,514400 | 0,033320 | 0,000000 |
| O6  | 8c | 1,000000 | 0,193260 | 0,289580 | 0,336850 | 0,000000 |

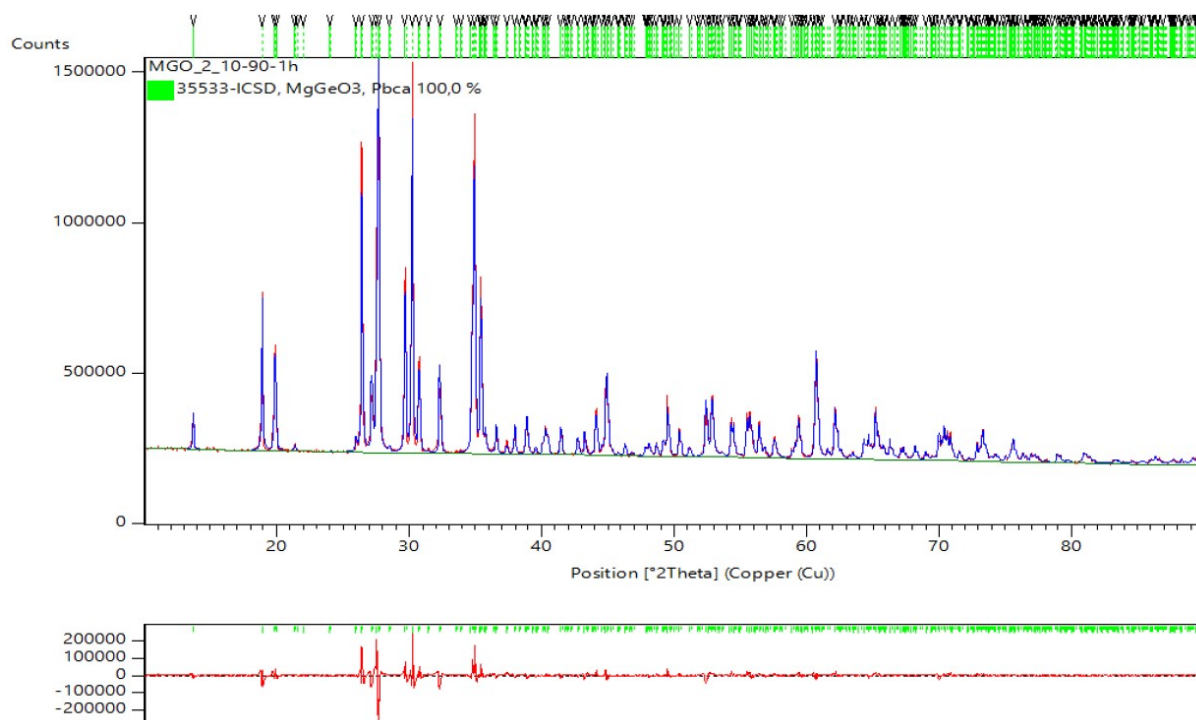

Figure S4. Rietveld refinement of XRD pattern of  $\text{MgGeO}_3:2\%\text{Cr}^{3+}$ .

$\text{MgGeO}_3:5\%\text{Cr}^{3+}$

### Global Parameters

|                             |              |
|-----------------------------|--------------|
| Number of used phases:      | 1            |
| Number of variables:        | 14           |
| Number of constraints:      | 0            |
| Zero shift/ °2Theta:        | 0,000000     |
| Specimen displacement/ mm : | -0,051(2)    |
| Profile function:           | Pseudo Voigt |
| Background:                 | Polynomial   |
| R (expected)/ %:            | 0,20980      |
| R (profile)/ %:             | 2,56354      |
| R (weighted profile)/ %:    | 3,93195      |
| GOF:                        | 351,25220    |
| d-statistic:                | 0,45203      |
| U standard:                 | 0,000000     |
| V standard:                 | 0,000000     |
| W standard:                 | 0,010000     |

|                                     |                       |
|-------------------------------------|-----------------------|
| U Left:                             | 0,000000              |
| V Left:                             | 0,000000              |
| W Left:                             | 0,010000              |
| U Right:                            | 0,000000              |
| V Right:                            | 0,000000              |
| W Right:                            | 0,010000              |
| Asymmetry Type:                     | No Asymmetry Function |
| Asymmetry 1:                        | 0,000000              |
| Asymmetry 2:                        | 0,000000              |
| Shape Type:                         | Shape Individual      |
| Shape 1 Left:                       | 0,600000              |
| Shape 2 Left:                       | 0,000000              |
| Shape 3 Left:                       | 0,000000              |
| Shape 1 Right:                      | 0,600000              |
| Shape 2 Right:                      | 0,000000              |
| Shape 3 Right:                      | 0,000000              |
| K a1/a2 intensity ratio:            | 0,500000              |
| K alpha/beta intensity ratio:       | 0,000000              |
| Crystal Shape Factor K:             | 1,0000                |
| Instrumental FWHM Curve Type:       | Caglioti function     |
| Instr. Gauss Curve Coefficient A:   | 0,0045(5)             |
| Instr. Gauss Curve Coefficient B:   | -0,0032(9)            |
| Instr. Gauss Curve Coefficient C:   | 0,0046(3)             |
| Instr. Lorentz Curve Coefficient A: | 0,0062(7)             |
| Instr. Lorentz Curve Coefficient B: | -0,004(1)             |
| Instr. Lorentz Curve Coefficient C: | 0,0064(5)             |

### **Relevant parameters of 35533-ICSD, MgGeO3, Pbca**

|                                         |                                                   |
|-----------------------------------------|---------------------------------------------------|
| Structure and profile data:             |                                                   |
| Formula sum:                            | Mg <sub>16</sub> Ge <sub>16</sub> O <sub>48</sub> |
| Formula mass/ g/mol:                    | 2318,2910                                         |
| Density (calculated)/ g/cm <sup>3</sup> | 4,2735                                            |
| F(000):                                 | 1088,0000                                         |
| Weight fraction/ %:                     | 100,000000                                        |
| Space group (No.):                      | P b c a (61)                                      |
| Lattice parameters:                     |                                                   |
| a/ A:                                   | 18,8102(6)                                        |
| b/ A:                                   | 8,9594(3)                                         |
| c/ A:                                   | 5,3444(2)                                         |
| alpha/ °:                               | 90                                                |
| beta/ °:                                | 90                                                |
| gamma/ °:                               | 90                                                |
| V/ 10 <sup>6</sup> pm <sup>3</sup>      | 900,68280                                         |
| Overall displacement parameter:         | 0,000000                                          |
| Extinction:                             | 0,000000                                          |
| Flat Plate Absorption Correction:       | 0,000000                                          |
| Porosity:                               | 0,000000                                          |
| Roughness:                              | 0,000000                                          |
| Fitting mode:                           | Structure Fit                                     |
| U Left:                                 | 0,04(1)                                           |
| V Left:                                 | -0,012(9)                                         |
| W Left:                                 | 0,014(2)                                          |
| Preferred orientation direction/ hkl:   | 0,00 0,00 1,00                                    |
| Preferred orientation parameter:        | 1,000000                                          |
| Asymmetry parameter 1:                  | 0,000000                                          |
| Asymmetry parameter 2:                  | 0,000000                                          |
| Peak shape:                             |                                                   |
| parameter 1 Left:                       | 0,63(2)                                           |
| parameter 2 Left:                       | 0,000000                                          |
| parameter 3 Left:                       | 0,000000                                          |
| R (Bragg)/ %:                           | 2,83244                                           |

### **Occupancy, atomic fract. coordinates and Biso for 35533-ICSD, MgGeO3, Pbca**

| Atom | Wyck. | s.o.f.   | x        | y        | z        | B/ 10 <sup>4</sup> pm <sup>2</sup> |  |
|------|-------|----------|----------|----------|----------|------------------------------------|--|
| Mg1  | 8c    | 1,000000 | 0,123360 | 0,656530 | 0,851890 | 0,000000                           |  |
| Mg2  | 8c    | 1,000000 | 0,122190 | 0,488820 | 0,343520 | 0,000000                           |  |
| Ge1  | 8c    | 1,000000 | 0,027800 | 0,339590 | 0,805350 | 0,000000                           |  |
| Ge2  | 8c    | 1,000000 | 0,229070 | 0,345090 | 0,041410 | 0,000000                           |  |
| O1   | 8c    | 1,000000 | 0,935450 | 0,338430 | 0,814780 | 0,000000                           |  |
| O2   | 8c    | 1,000000 | 0,069360 | 0,488810 | 0,670450 | 0,000000                           |  |

|    |    |          |          |          |          |          |
|----|----|----------|----------|----------|----------|----------|
| O3 | 8c | 1,000000 | 0,055450 | 0,319810 | 0,125190 | 0,000000 |
| O4 | 8c | 1,000000 | 0,320480 | 0,340070 | 0,021910 | 0,000000 |
| O5 | 8c | 1,000000 | 0,187680 | 0,514400 | 0,033320 | 0,000000 |
| O6 | 8c | 1,000000 | 0,193260 | 0,289580 | 0,336850 | 0,000000 |

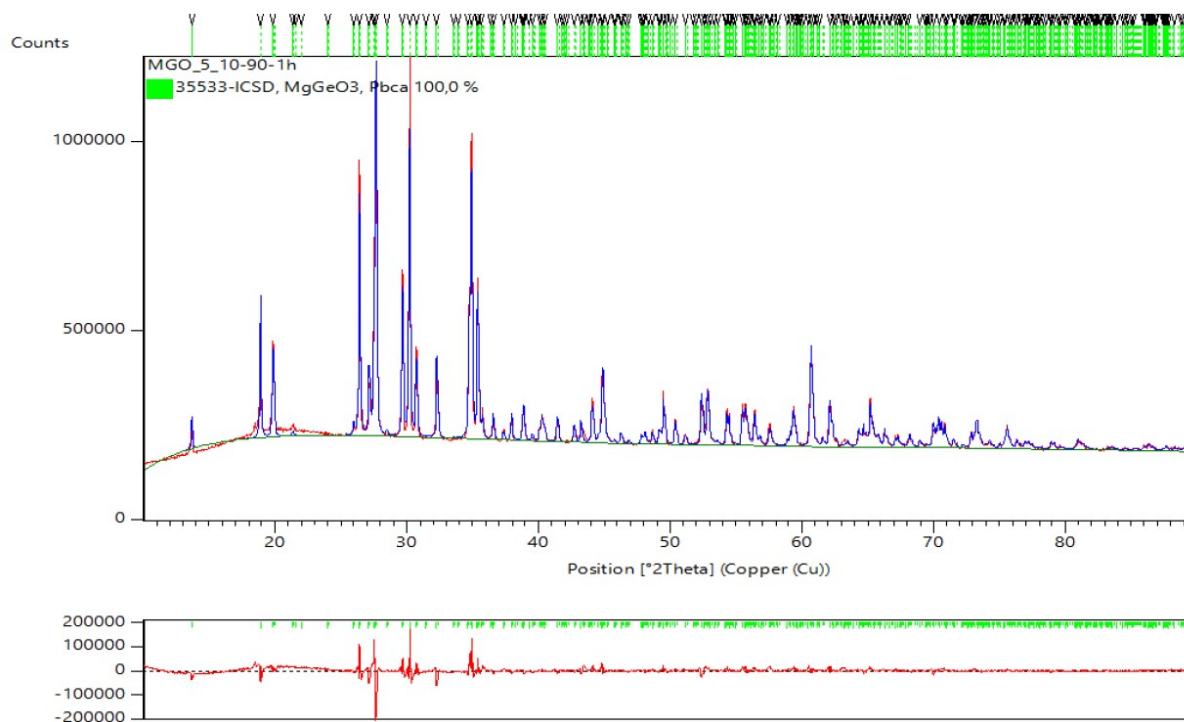

**Figure S5.** Rietveld refinement of XRD pattern of  $\text{MgGeO}_3:5\%\text{Cr}^{3+}$ .

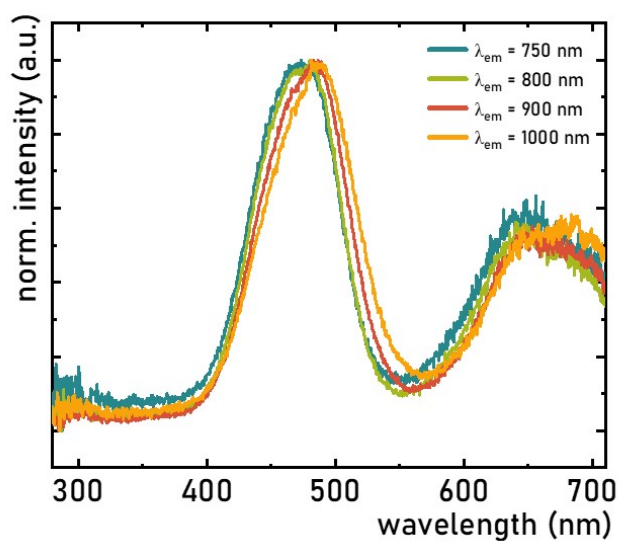

**Figure S6.** Room-temperature excitation spectra as a function of  $\lambda_{\text{em}}$  for the  $\text{MgGeO}_3:5\%\text{Cr}^{3+}$  ( $\lambda_{\text{exc}} = 445 \text{ nm}$ ).

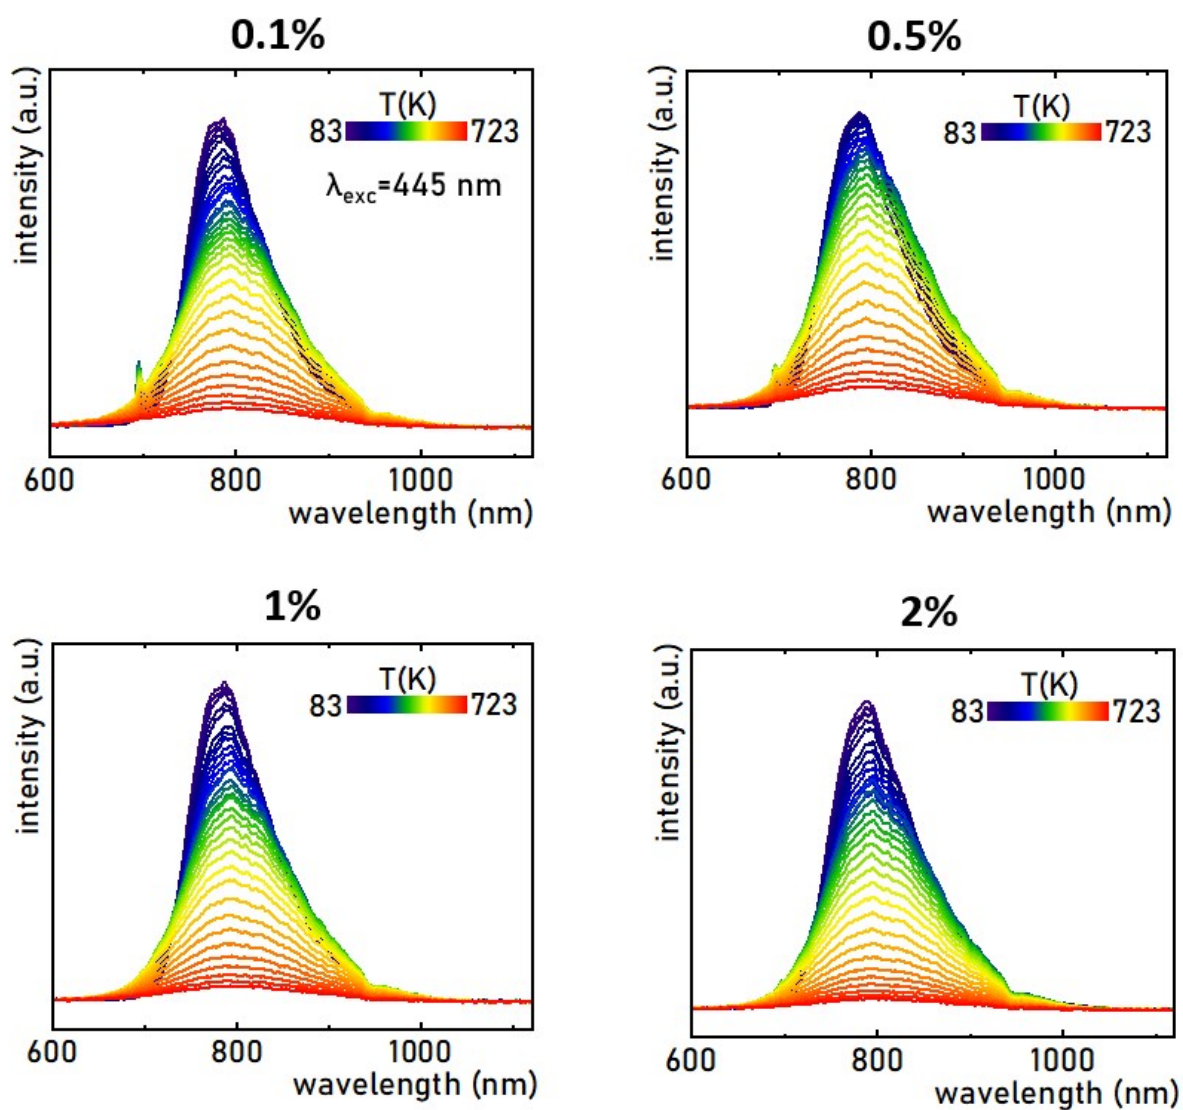

**Figure S7.** Temperature-dependent emission spectra for the MgGeO<sub>3</sub> doped with various Cr<sup>3+</sup> concentration (0,1, 0.5, 1, 2%) upon  $\lambda_{\text{exc}} = 445 \text{ nm}$ .

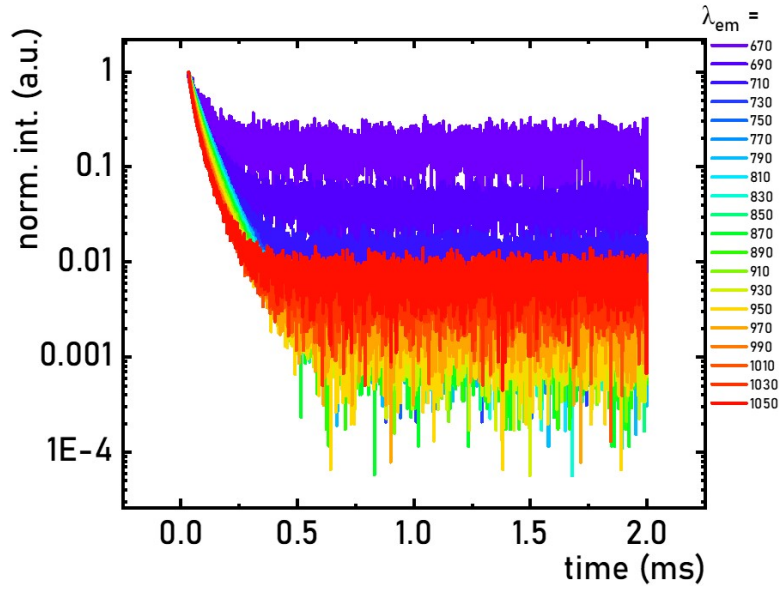

**Figure S8.** Room-temperature decay curves as a function of  $\lambda_{em}$  for the  $MgGeO_3:1\%Cr^{3+}$ .

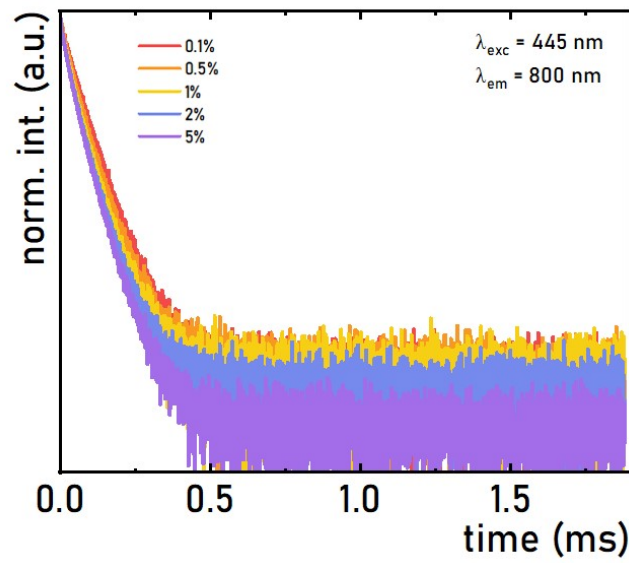

**Figure S9.** Room-temperature decay curves as a function of  $Cr^{3+}$  concentration in doped  $MgGeO_3$  ( $\lambda_{exc} = 445$  nm,  $\lambda_{em} = 800$  nm).
